# Supplementary material for: Stable freestanding two-dimensional anionic electrons in YCl with extremely weak interlayer interaction
Source: Royal Society of Chemistry journal article supplement (doi:10.1039/d2tc00667g), 2022-01-01
Supplement: d2tc00667g1.pdf [file d2tc00667g1.pdf]

**Supplementary Materials for**  
**Stable freestanding two-dimensional anionic electrons in YCl with extremely**  
**weak interlayer interaction**

Zhenghui Fang,<sup>a</sup> Xuguang Wang,<sup>a</sup> Xinyu Cao,<sup>a</sup> Hao Yang,<sup>a</sup> Feifei Yin,<sup>a</sup>

Kai Liu<sup>b</sup> and Xiao Zhang<sup>a\*</sup>

<sup>a</sup>State Key Laboratory of Information Photonics and Optical Communications & School of Science,  
Beijing University of Posts and Telecommunications, Beijing 100876, China

<sup>b</sup>Department of Physics and Beijing Key Laboratory of Opto-electronic Functional Materials & Micro-  
nano Devices, Renmin University of China, Beijing 100872, China

\*Corresponding author: [zhangxiaobupt@bupt.edu.cn](mailto:zhangxiaobupt@bupt.edu.cn)

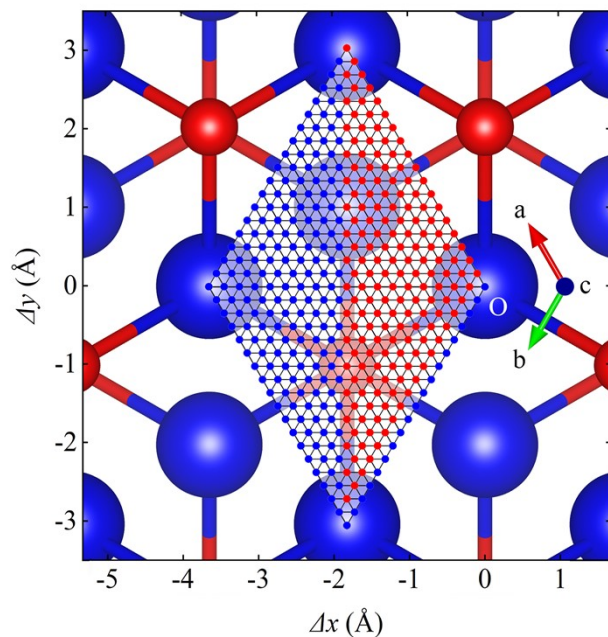

Figure S1. Schematic diagram of each sampled structure in the simulation of the quasi-static process of relative sliding between YCl bilayers. When stacked in AA sequence, the relative sliding between the layers of the YCl bilayer is considered as zero, corresponding to the origin of the coordinates (marked as O). One sampling structure is taken for every  $a/18$  ( $0.20 \text{ \AA}$ ) sliding of the upper layer with respect to the fixed lower layer (ML YCl in the background), corresponding to the intersection point in the rhombic grid. The displacement of the relative sliding between the layers of each sampling structure is the distance from its corresponding intersection point to the origin. Considering symmetry, all points corresponding to irreducible structures are marked in red.

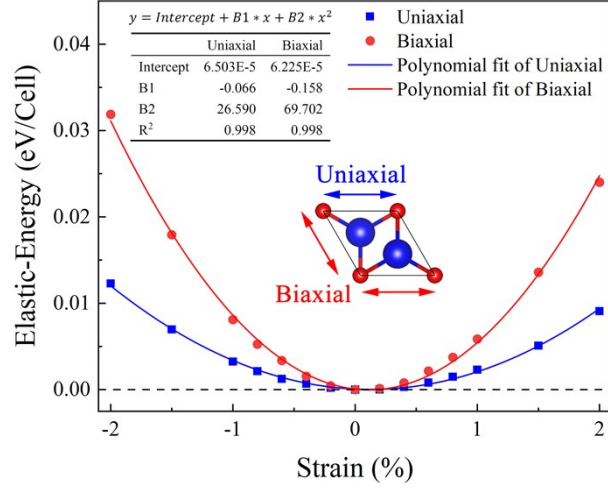

Figure S2. The elastic energy curves of ML YCl under applied uniaxial and biaxial strains and their second-order polynomial fitting curves. Insets: parameters of the second-order polynomial fit and schematic diagrams of applied uniaxial and biaxial strains.

The in-plane second-order elastic constants play a crucial role in understanding the mechanical and dynamic properties of 2D materials by providing information on material stiffness and stability. Applying a small strain to the equilibrium lattice configuration in the linear elastic region, the elastic energy change of a 2D material in the harmonic approximation can be given by the following formula [1]

$$E_{elastic}^{2D} = S \left( \frac{1}{2} C_{11} \varepsilon_1^2 + \frac{1}{2} C_{22} \varepsilon_2^2 + C_{12} \varepsilon_1 \varepsilon_2 + 2C_{16} \varepsilon_1 \varepsilon_6 + 2C_{26} \varepsilon_2 \varepsilon_6 + 2C_{66} \varepsilon_6^2 \right)$$

where  $E_{elastic}^{2D}$  is the difference between the total energy of the equilibrium and distorted lattice cells,  $S$  is the area of the equilibrium 2D material,  $C_{ij}$  ( $i, j = 1, 2, 6$ ) is the in-plane stiffness tensor in N/m, and  $\varepsilon_i$  ( $i = 1, 2, 6$ ) is the independent component of the strain tensor  $\varepsilon$ . The lattice vector relationship between the distorted lattice and the equilibrium lattice is given by

$$\begin{pmatrix} a' \\ b' \\ c' \end{pmatrix} = \begin{pmatrix} a \\ b \\ c \end{pmatrix} \cdot (I + \varepsilon)$$

where  $I$  is the unit matrix. The strain tensor  $\varepsilon$  is expressed as the following vector with six independent components

$$\varepsilon = \begin{pmatrix} \varepsilon_1 & \frac{\varepsilon_6}{2} & \frac{\varepsilon_5}{2} \\ \frac{\varepsilon_6}{2} & \varepsilon_2 & \frac{\varepsilon_4}{2} \\ \frac{\varepsilon_5}{2} & \frac{\varepsilon_4}{2} & \varepsilon_3 \end{pmatrix}$$

As a 2D material, the ML YCl belongs to the hexagonal crystal system, which has only two independent elastic constants  $C_{11}$  and  $C_{12}$  considering symmetry.[2] In the energy-strain approach, the elastic constants can be derived from the quadratic coefficients of the elastic energy-strain curve. To obtain the elastic constant  $C_{11}$ , a uniaxial strain along the  $a$ -axis is applied to the equilibrium

lattice

$$\varepsilon_{Uniaxial} = \begin{pmatrix} \varepsilon_1 & 0 & 0 \\ 0 & 0 & 0 \\ 0 & 0 & 0 \end{pmatrix}$$

The elastic energy of the ML YCl under uniaxial strain is

$$E_{Uniaxial}^{2D} = S\left(\frac{1}{2}C_{11}\varepsilon_1^2\right)$$

Comparing the quadratic coefficients of the elastic energy-uniaxial strain fitting curve (i.e., the blue curve in Fig. S2),  $C_{11} = 74.289 \text{ N/m}$  can be obtained. Similarly, to obtain the constant  $C_{12}$ , an equal biaxial strain along the  $a$  and  $b$  axes is applied to the equilibrium lattice

$$\varepsilon_{Biaxial} = \begin{pmatrix} \varepsilon_1 & 0 & 0 \\ 0 & \varepsilon_2 & 0 \\ 0 & 0 & 0 \end{pmatrix} = \begin{pmatrix} \varepsilon_1 & 0 & 0 \\ 0 & \varepsilon_1 & 0 \\ 0 & 0 & 0 \end{pmatrix}$$

The elastic energy of the ML YCl under biaxial strain is

$$E_{Biaxial}^{2D} = S\left(\frac{1}{2}C_{11}\varepsilon_1^2 + \frac{1}{2}C_{22}\varepsilon_2^2 + C_{12}\varepsilon_1\varepsilon_2\right) = S(C_{11}\varepsilon_1^2 + C_{12}\varepsilon_1\varepsilon_2) = S(C_{11} + C_{12})\varepsilon_1^2$$

Comparing the quadratic coefficients of the elastic energy-biaxial strain fitting curve (i.e., the red curve in Fig. S2) and  $C_{11}$ ,  $C_{12} = 23.076 \text{ N/m}$  can be obtained. The two calculated elastic constants satisfy the mechanical stability criterion:  $C_{11} > 0$  and  $C_{11} > |C_{12}|$ , meaning that the ML YCl is mechanically stable.[2] Using these known elastic constants, the in-plane Young's modulus ( $Y_{2D}$ ), shear modulus ( $G_{2D}$ ), and Poisson's ratio ( $\nu_{2D}$ ) of YCl can be obtained as follows

$$\begin{cases} Y_{2D} = \frac{C_{11}^2 - C_{12}^2}{C_{11}} = 67.121 \text{ N/m} \\ G_{2D} = \frac{C_{11} - C_{12}}{2} = 25.606 \text{ N/m} \\ \nu_{2D} = \frac{C_{12}}{C_{11}} = 0.311 \end{cases}$$

The vertical deformation  $h$  occurring under gravity in an independent ML YCl of size  $l$  can be estimated by the following equation [1]

$$\frac{h}{l} \approx \left(\frac{\rho gl}{Y_{2D}}\right)^{\frac{1}{3}}$$

where  $g$  is the gravitational acceleration,  $\rho$  is the density of ML YCl ( $\rho = 1.29 \times 10^{-4} \text{ kg m}^{-2}$ ). It is found that the ratio of vertical deformation to film size  $h/l$  is only  $1.23 \times 10^{-3}$  even for a large YCl film with  $l = 100 \text{ }\mu\text{m}$ . This result indicates that the in-plane stiffness of ML YCl is sufficient to avoid curling and makes itself form a freestanding film.

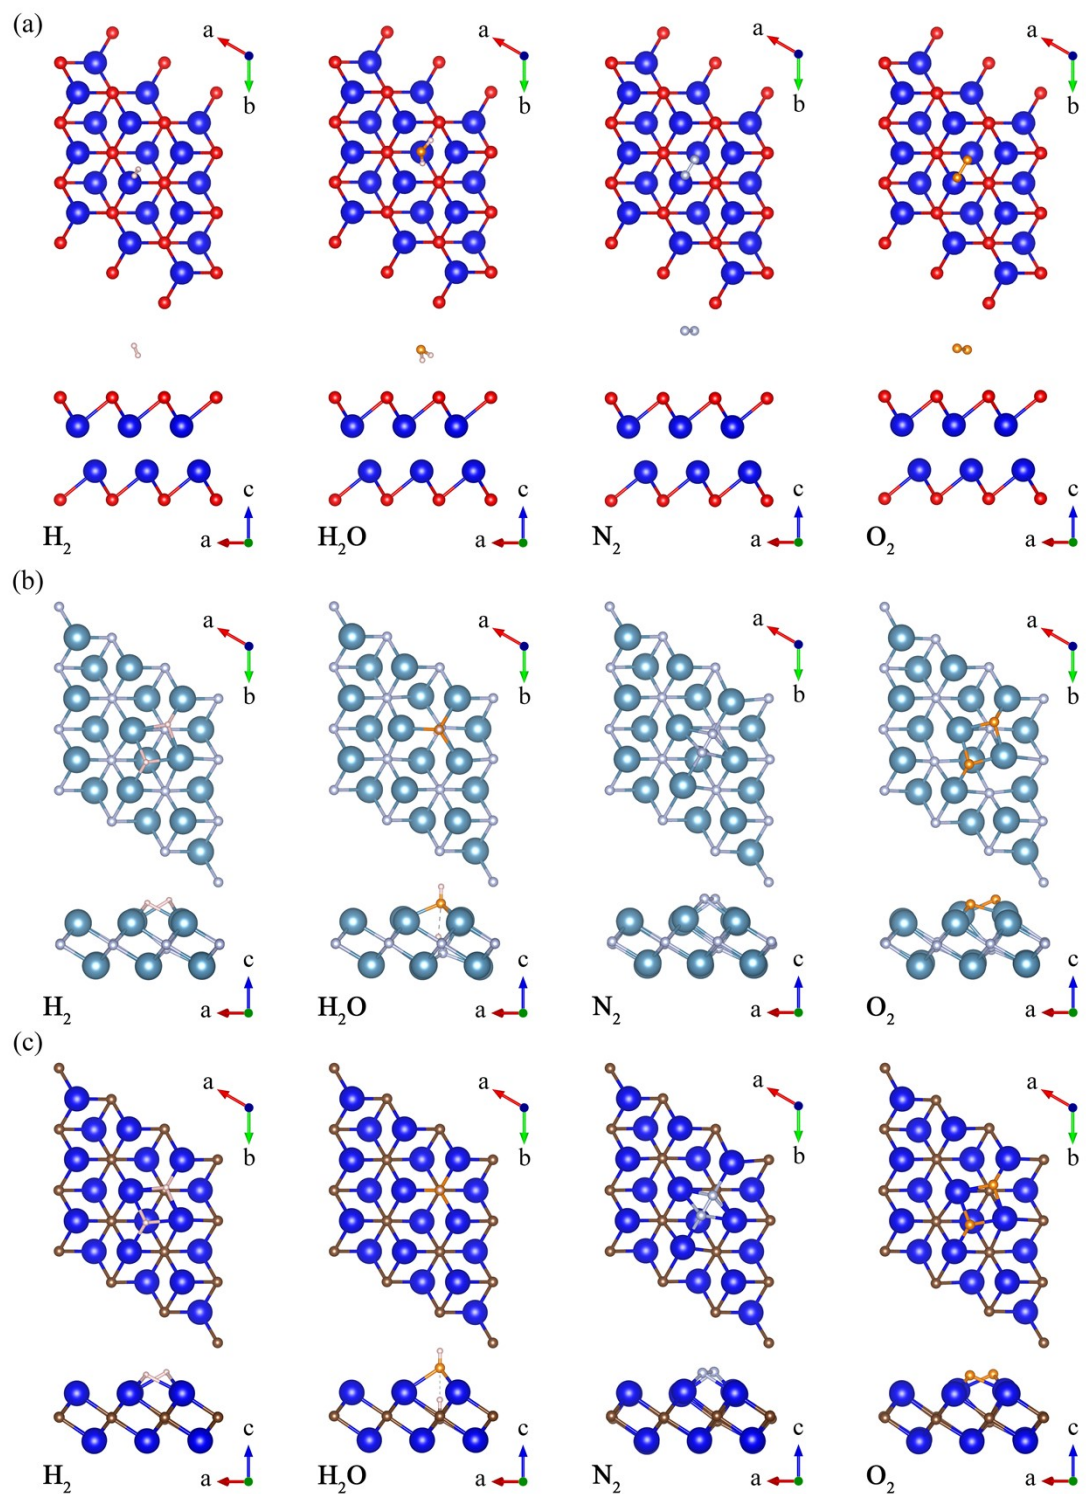

Figure S3. Top and side views of  $\text{H}_2$ ,  $\text{H}_2\text{O}$ ,  $\text{N}_2$ , and  $\text{O}_2$  absorbed on the ML (a)  $\text{YCl}$ , (b)  $\text{Ca}_2\text{N}$ , and (c)  $\text{Y}_2\text{C}$ . Red, blue, cyan, brown, white, orange, and silver balls denote chlorine, yttrium, calcium, carbon, hydrogen, oxygen, and nitrogen atoms, respectively.

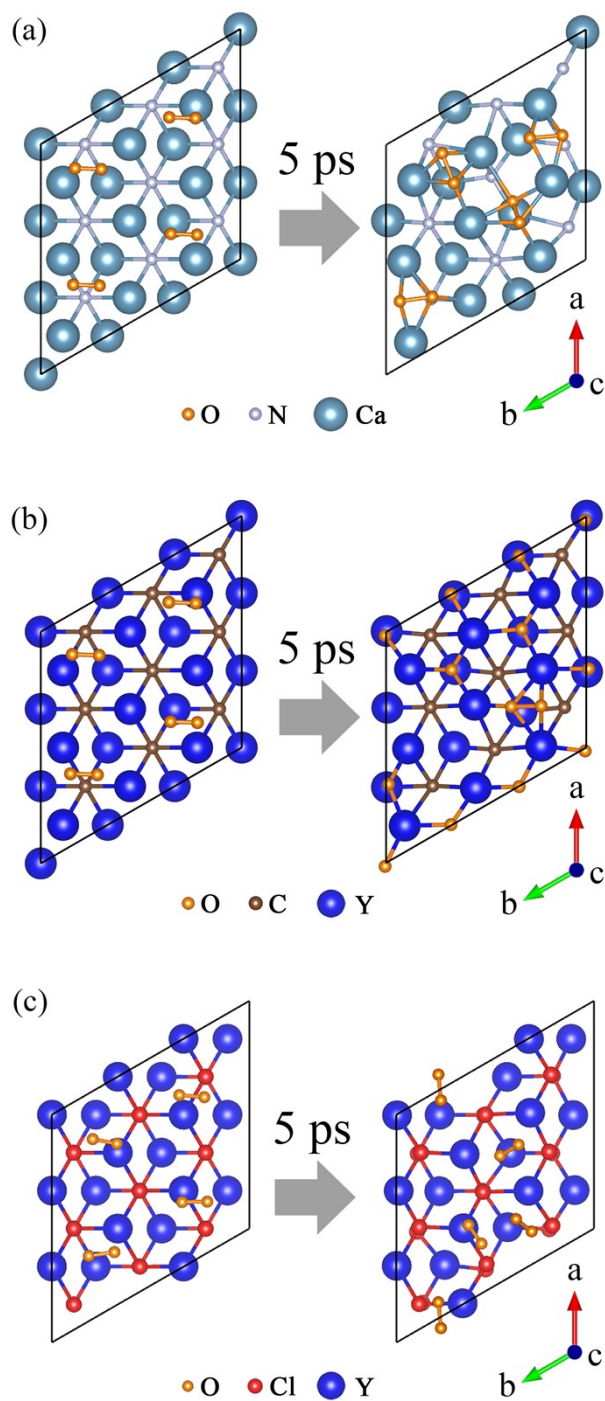

Figure S4. Top views of the initial and final snapshots of 2D systems with gaseous phase oxygen after 5.0 ps AIMD simulations at the temperature of 300 K for ML (a)  $\text{Ca}_2\text{N}$ , (b)  $\text{Y}_2\text{C}$ , and (c)  $\text{YCl}$ .

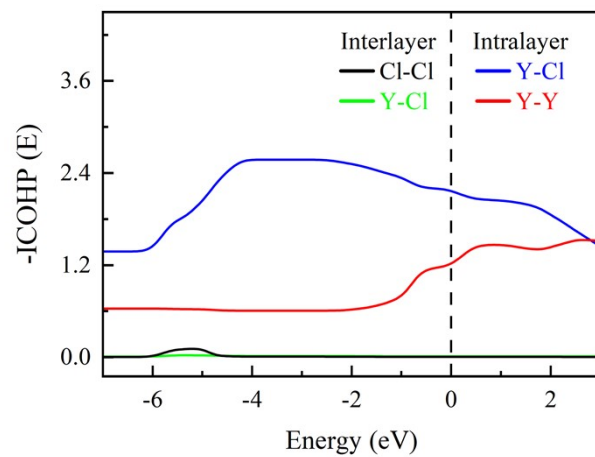

Figure S5. The integral of the COHP (ICOHP) of the local chemical bonds between the atoms in the bulk YCl.

Table S1. Easily exfoliated binaries with up to six atoms per unit cell.[3] If a 2D substructure can be exfoliated from multiple 3D parents, the most easily exfoliated ones (corresponding to the smallest  $E_b$ ) are listed. In this table, binaries that do not have sandwich-like structures wrapped by chalcogen and halogen elements are marked with the asterisk.

| Formula                         | Space group  | $E_b$ (meV/Å <sup>2</sup> ) |       | Experimental 3D parent structure(s)                            |           |         |
|---------------------------------|--------------|-----------------------------|-------|----------------------------------------------------------------|-----------|---------|
|                                 |              | DF2-C09                     | rVV10 | Formula                                                        | Source DB | DB ID   |
| * SiH                           | $P\bar{3}m1$ | 9.0                         | 13.0  | Si <sub>2</sub> H <sub>2</sub>                                 | ICSD      | 41478   |
| * BN                            | $P\bar{6}m2$ | 19.4                        | 24.4  | B <sub>2</sub> N <sub>2</sub>                                  | ICSD      | 186248  |
| * W <sub>2</sub> N <sub>3</sub> | $P\bar{6}m2$ | 26.3                        | 39.8  | W <sub>4</sub> N <sub>6</sub>                                  | ICSD      | 186207  |
| * PbO                           | $P4/nmm$     | 7.8                         | 14.3  | Ag <sub>2</sub> Pb <sub>2</sub> O <sub>2</sub> Br <sub>2</sub> | ICSD      | 33913   |
| FeO <sub>2</sub>                | $Pm\bar{m}n$ | 16.3                        | 29.8  | Fe <sub>2</sub> O <sub>4</sub>                                 | COD       | 9015156 |
| NiO <sub>2</sub>                | $P\bar{3}m1$ | 16.6                        | 27.6  | NiO <sub>2</sub>                                               | COD       | 1522025 |
| PtO <sub>2</sub>                | $P\bar{3}m1$ | 19.3                        | 32.3  | Pt <sub>2</sub> O <sub>4</sub>                                 | ICSD      | 24923   |
| Tl <sub>2</sub> O               | $P\bar{3}m1$ | 19.4                        | 27.3  | Tl <sub>4</sub> O <sub>2</sub>                                 | COD       | 1528007 |
| CoO <sub>2</sub>                | $P\bar{3}m1$ | 22.6                        | 34.3  | CoO <sub>2</sub>                                               | COD       | 1522027 |
| * SnO                           | $P4/nmm$     | 29.8                        | 34.6  | Sn <sub>2</sub> O <sub>2</sub>                                 | COD       | 7206470 |
| SnO                             | $C2/m$       | -                           | 28.4  | Sn <sub>4</sub> O <sub>4</sub>                                 | ICSD      | 424729  |
| GaS                             | $P\bar{6}m2$ | 15.8                        | 20.8  | Ga <sub>4</sub> S <sub>4</sub>                                 | ICSD      | 635254  |
| GaS                             | $P\bar{3}m1$ | 16.1                        | 20.8  | Ga <sub>2</sub> S <sub>2</sub>                                 | ICSD      | 40824   |
| SnS <sub>2</sub>                | $P\bar{3}m1$ | 16.7                        | 23.7  | Sn <sub>2</sub> S <sub>4</sub>                                 | ICSD      | 43003   |
| HfS <sub>2</sub>                | $P\bar{3}m1$ | 18.2                        | 23.2  | HfS <sub>2</sub>                                               | ICSD      | 638847  |
| ZrS <sub>2</sub>                | $P\bar{3}m1$ | 19.0                        | 24.1  | ZrS <sub>2</sub>                                               | COD       | 5910006 |
| Tl <sub>2</sub> S               | $P\bar{3}m1$ | 19.2                        | -     | Tl <sub>2</sub> S                                              | COD       | 9012278 |
| MoS <sub>2</sub>                | $P\bar{6}m2$ | 21.6                        | 28.8  | Mo <sub>2</sub> S <sub>4</sub>                                 | ICSD      | 644259  |
| TaS <sub>2</sub>                | $P\bar{3}m1$ | 22.3                        | 27.6  | TaS <sub>2</sub>                                               | COD       | 9011539 |
| WS <sub>2</sub>                 | $P\bar{6}m2$ | 22.7                        | 29.9  | WS <sub>2</sub>                                                | COD       | 9012192 |
| NbS <sub>2</sub>                | $P\bar{3}m1$ | 23.2                        | 28.0  | NbS <sub>2</sub>                                               | ICSD      | 24755   |
| TaS <sub>2</sub>                | $P\bar{6}m2$ | 23.2                        | 28.6  | TaS <sub>2</sub>                                               | ICSD      | 651083  |
| FeS                             | $P4/nmm$     | 23.3                        | 29.4  | Fe <sub>2</sub> S <sub>2</sub>                                 | COD       | 9011800 |
| TiS <sub>2</sub>                | $P\bar{3}m1$ | 23.8                        | 27.4  | TiS <sub>2</sub>                                               | COD       | 1010275 |
| NbS <sub>2</sub>                | $P\bar{6}m2$ | 24.3                        | 29.0  | NbS <sub>2</sub>                                               | ICSD      | 237034  |
| * PdS <sub>2</sub>              | $P2_1/c$     | 27.1                        | 31.5  | Pd <sub>4</sub> S <sub>8</sub>                                 | COD       | 2310589 |
| PtS <sub>2</sub>                | $P\bar{3}m1$ | 27.3                        | 33.0  | PtS <sub>2</sub>                                               | COD       | 5910085 |
| VS <sub>2</sub>                 | $P\bar{3}m1$ | 27.7                        | 31.2  | VS <sub>2</sub>                                                | ICSD      | 651361  |
| MoS <sub>2</sub>                | $P\bar{3}m1$ | 28.7                        | 33.5  | MoS <sub>2</sub>                                               | ICSD      | 26622   |
| * GeS                           | $Pmn2_1$     | 37.3                        | 34.8  | Ge <sub>4</sub> S <sub>4</sub>                                 | COD       | 9008784 |
| InSe                            | $P\bar{6}m2$ | 14.9                        | 20.8  | In <sub>4</sub> Se <sub>4</sub>                                | COD       | 9008967 |
| GaSe                            | $P\bar{6}m2$ | 15.1                        | 20.4  | Ga <sub>4</sub> Se <sub>4</sub>                                | COD       | 9008968 |
| In <sub>2</sub> Se <sub>3</sub> | $C2$         | 16.1                        | 23.5  | In <sub>2</sub> Se <sub>3</sub>                                | ICSD      | 602266  |
| SnSe <sub>2</sub>               | $P\bar{3}m1$ | 17.3                        | 25.0  | SnSe <sub>2</sub>                                              | ICSD      | 43857   |
| HfSe <sub>2</sub>               | $P\bar{3}m1$ | 18.8                        | 23.9  | HfSe <sub>2</sub>                                              | ICSD      | 182678  |
| Bi <sub>2</sub> Se <sub>3</sub> | $P\bar{3}m1$ | 19.6                        | 26.6  | Bi <sub>2</sub> Se <sub>3</sub>                                | COD       | 9011965 |
| ZrSe <sub>2</sub>               | $P\bar{3}m1$ | 20.0                        | 25.0  | ZrSe <sub>2</sub>                                              | COD       | 5910026 |
| MoSe <sub>2</sub>               | $P\bar{6}m2$ | 20.4                        | 28.4  | Mo <sub>2</sub> Se <sub>4</sub>                                | ICSD      | 644346  |



|                                 |              |      |      |                                                 |      |         |
|---------------------------------|--------------|------|------|-------------------------------------------------|------|---------|
| TaSe <sub>2</sub>               | $P\bar{6}m2$ | 22.6 | 28.2 | Ta <sub>2</sub> Se <sub>4</sub>                 | ICSD | 651956  |
| WSe <sub>2</sub>                | $P\bar{6}m2$ | 22.6 | 30.0 | W <sub>2</sub> Se <sub>4</sub>                  | COD  | 9012193 |
| FeSe                            | $P4/nmm$     | 22.6 | 29.3 | Fe <sub>2</sub> Se <sub>2</sub>                 | ICSD | 290411  |
| TaSe <sub>2</sub>               | $P\bar{3}m1$ | 23.1 | 29.1 | TaSe <sub>2</sub>                               | ICSD | 651954  |
| CrSe <sub>2</sub>               | $C2/m$       | 23.3 | 29.7 | CrSe <sub>2</sub>                               | ICSD | 626718  |
| NbSe <sub>2</sub>               | $P\bar{6}m2$ | 23.5 | 28.8 | Nb <sub>2</sub> Se <sub>4</sub>                 | COD  | 9014575 |
| TiSe <sub>2</sub>               | $P\bar{3}m1$ | 24.0 | 28.2 | TiSe <sub>2</sub>                               | COD  | 1010276 |
| VSe <sub>2</sub>                | $P\bar{3}m1$ | 25.4 | 30.2 | VSe <sub>2</sub>                                | ICSD | 86520   |
| NbSe <sub>2</sub>               | $P\bar{3}m1$ | 27.1 | 32.0 | NbSe <sub>2</sub>                               | ICSD | 76576   |
| AuSe                            | $P2/m$       | 27.7 | 33.3 | Au <sub>2</sub> Se <sub>2</sub>                 | COD  | 1510294 |
| ReSe <sub>2</sub>               | $P\bar{6}m2$ | 28.3 | 30.3 | Re <sub>4</sub> Se <sub>8</sub>                 | ICSD | 650091  |
| PtSe <sub>2</sub>               | $P\bar{3}m1$ | 29.6 | 35.2 | PtSe <sub>2</sub>                               | COD  | 9009117 |
| InSe                            | $C2/m$       | 32.7 | 33.7 | In <sub>2</sub> Se <sub>2</sub>                 | ICSD | 32714   |
| * GeSe                          | $Pmn2_1$     | 36.0 | 33.9 | Ge <sub>4</sub> Se <sub>4</sub>                 | COD  | 1528768 |
| Cu <sub>2</sub> Te              | $C2/m$       | 14.6 | 20.5 | Cu <sub>4</sub> Te <sub>2</sub>                 | ICSD | 77055   |
| GaTe                            | $P\bar{6}m2$ | 15.7 | 20.6 | Ga <sub>4</sub> Te <sub>4</sub>                 | ICSD | 43328   |
| SiTe <sub>2</sub>               | $P\bar{3}m1$ | 19.9 | 25.6 | SiTe <sub>2</sub>                               | COD  | 9009119 |
| WTe <sub>2</sub>                | $P2_1/m$     | 22.1 | 28.4 | W <sub>4</sub> Te <sub>8</sub>                  | COD  | 2310355 |
| CuTe                            | $Pmmn$       | 22.2 | 27.0 | Cu <sub>2</sub> Te <sub>2</sub>                 | COD  | 1526237 |
| Bi <sub>2</sub> Te <sub>3</sub> | $P\bar{3}m1$ | 23.0 | 28.7 | SnBi <sub>4</sub> Te <sub>7</sub>               | ICSD | 236253  |
| HfTe <sub>2</sub>               | $P\bar{3}m1$ | 23.4 | 26.4 | HfTe <sub>2</sub>                               | ICSD | 603713  |
| MoTe <sub>2</sub>               | $P2_1/m$     | 24.5 | 30.1 | Mo <sub>4</sub> Te <sub>8</sub>                 | COD  | 2310356 |
| WTe <sub>2</sub>                | $P\bar{6}m2$ | 24.7 | 30.0 | W <sub>2</sub> Te <sub>4</sub>                  | ICSD | 653170  |
| MoTe <sub>2</sub>               | $P\bar{6}m2$ | 25.2 | 30.4 | Mo <sub>2</sub> Te <sub>4</sub>                 | COD  | 9009147 |
| Sb <sub>2</sub> Te <sub>3</sub> | $P\bar{3}m1$ | 25.2 | 30.0 | Sb <sub>2</sub> Te <sub>3</sub>                 | COD  | 9007590 |
| ZrTe <sub>2</sub>               | $P\bar{3}m1$ | 26.1 | 28.4 | ZrTe <sub>2</sub>                               | ICSD | 653213  |
| FeTe                            | $P4/nmm$     | 26.6 | 31.6 | Fe <sub>2</sub> Te <sub>2</sub>                 | ICSD | 169974  |
| VTe <sub>2</sub>                | $P\bar{3}m1$ | 27.1 | 30.1 | VTe <sub>2</sub>                                | ICSD | 603582  |
| * PbTe                          | $P3m1$       | 27.5 | 33.0 | Pb <sub>2</sub> Bi <sub>2</sub> Te <sub>5</sub> | ICSD | 42708   |
| TiTe <sub>2</sub>               | $P\bar{3}m1$ | 28.1 | 30.2 | TiTe <sub>2</sub>                               | COD  | 1008063 |
| NbTe <sub>2</sub>               | $P\bar{3}m1$ | 28.3 | 31.8 | NbTe <sub>2</sub>                               | ICSD | 645529  |
| Hf <sub>3</sub> Te <sub>2</sub> | $P4/mmm$     | 31.7 | 33.1 | Hf <sub>3</sub> Te <sub>2</sub>                 | ICSD | 75936   |
| * SnTe                          | $Pmn2_1$     | 34.2 | 33.2 | Sn <sub>4</sub> Te <sub>4</sub>                 | ICSD | 652743  |
| * TlF                           | $P4/nmm$     | 14.1 | 20.1 | Tl <sub>2</sub> F <sub>2</sub>                  | COD  | 1520825 |
| NbF <sub>4</sub>                | $P4/mmm$     | 15.1 | 29.1 | NbF <sub>4</sub>                                | ICSD | 25768   |
| PbF <sub>4</sub>                | $P4/mmm$     | 15.7 | 29.0 | PbF <sub>4</sub>                                | COD  | 1528583 |
| SnF <sub>4</sub>                | $P4/mmm$     | 22.8 | 33.3 | SnF <sub>4</sub>                                | COD  | 1528582 |
| * AgF <sub>2</sub>              | $P2_1/c$     | 28.2 | 42.5 | Ag <sub>4</sub> F <sub>8</sub>                  | COD  | 1509321 |
| FeCl <sub>2</sub>               | $P\bar{3}m1$ | 9.7  | 15.2 | FeCl <sub>2</sub>                               | COD  | 9014952 |
| ZnCl <sub>2</sub>               | $P\bar{4}m2$ | 9.8  | 15.9 | Zn <sub>2</sub> Cl <sub>4</sub>                 | ICSD | 26152   |
| CoCl <sub>2</sub>               | $P\bar{3}m1$ | 10.7 | 15.9 | CoCl <sub>2</sub>                               | COD  | 9014719 |
| CdCl <sub>2</sub>               | $P\bar{3}m1$ | 11.0 | 17.8 | CdCl <sub>2</sub>                               | COD  | 9009125 |
| LaCl                            | $P\bar{3}m1$ | 11.0 | 16.8 | La <sub>2</sub> Cl <sub>2</sub>                 | ICSD | 24410   |
| ZnCl <sub>2</sub>               | $P\bar{3}m1$ | 11.1 | 16.8 | ZnCl <sub>2</sub>                               | COD  | 9009136 |

|                   |              |      |      |                                                                               |      |         |
|-------------------|--------------|------|------|-------------------------------------------------------------------------------|------|---------|
| TbCl              | $P\bar{3}m1$ | 11.2 | -    | Tb <sub>2</sub> Cl <sub>2</sub>                                               | ICSD | 23351   |
| YCl               | $P\bar{3}m1$ | 12.0 | 17.6 | Y <sub>2</sub> Cl <sub>2</sub>                                                | ICSD | 30708   |
| MgCl <sub>2</sub> | $P\bar{3}m1$ | 12.3 | 17.7 | MgCl <sub>2</sub>                                                             | COD  | 9009129 |
| CuCl <sub>2</sub> | $C2/m$       | 13.4 | 19.7 | CuCl <sub>2</sub>                                                             | COD  | 9001506 |
| ScCl              | $P\bar{3}m1$ | 13.8 | 19.4 | Sc <sub>2</sub> Cl <sub>2</sub>                                               | COD  | 4343683 |
| PdCl <sub>2</sub> | $P2_1/c$     | 14.0 | 21.3 | Pd <sub>2</sub> Cl <sub>4</sub>                                               | ICSD | 421221  |
| RbCl              | $P4/nmm$     | 14.4 | 18.7 | Rb <sub>2</sub> Ni <sub>2</sub> C <sub>4</sub> N <sub>4</sub> Cl <sub>2</sub> | ICSD | 380471  |
| ZrCl <sub>2</sub> | $P\bar{6}m2$ | 14.5 | 21.4 | ZrCl <sub>2</sub>                                                             | ICSD | 30052   |
| ZrCl              | $P\bar{3}m1$ | 14.7 | 21.8 | Zr <sub>2</sub> Cl <sub>2</sub>                                               | ICSD | 20145   |
| MnCl <sub>2</sub> | $C2/m$       | 14.8 | 21.5 | MnCl <sub>2</sub>                                                             | COD  | 9009130 |
| TiCl <sub>2</sub> | $P\bar{3}m1$ | 14.9 | 21.6 | TiCl <sub>2</sub>                                                             | COD  | 9009121 |
| VCl <sub>2</sub>  | $C2/m$       | 15.5 | 22.1 | VCl <sub>2</sub>                                                              | COD  | 1528165 |
| NiCl <sub>2</sub> | $P\bar{3}m1$ | 16.3 | 22.6 | NiCl <sub>2</sub>                                                             | COD  | 9009132 |
| * AgBr            | $P2_1/m$     | 7.8  | 14.3 | Ag <sub>2</sub> Pb <sub>2</sub> O <sub>2</sub> Br <sub>2</sub>                | ICSD | 33913   |
| MgBr <sub>2</sub> | $P\bar{3}m1$ | 10.2 | 15.3 | MgBr <sub>2</sub>                                                             | COD  | 8103685 |
| CdBr <sub>2</sub> | $P\bar{3}m1$ | 10.8 | 17.5 | CdBr <sub>2</sub>                                                             | COD  | 9009124 |
| LaBr <sub>2</sub> | $P\bar{6}m2$ | 11.2 | 16.8 | La <sub>2</sub> Br <sub>4</sub>                                               | ICSD | 65481   |
| ZnBr <sub>2</sub> | $P\bar{3}m1$ | 11.4 | 20.0 | ZnBr <sub>2</sub>                                                             | COD  | 9011540 |
| LaBr              | $P\bar{3}m1$ | 11.7 | 17.5 | La <sub>2</sub> Br <sub>2</sub>                                               | ICSD | 23354   |
| TbBr              | $P\bar{3}m1$ | 12.2 | 17.9 | Tb <sub>2</sub> Br <sub>2</sub>                                               | ICSD | 23353   |
| AuBr              | $Cmme$       | 12.7 | 21.0 | Au <sub>4</sub> Br <sub>4</sub>                                               | COD  | 1510610 |
| MnBr <sub>2</sub> | $C2/m$       | 15.0 | 21.6 | MnBr <sub>2</sub>                                                             | ICSD | 67500   |
| TiBr <sub>2</sub> | $P\bar{3}m1$ | 15.3 | 21.8 | TiBr <sub>2</sub>                                                             | ICSD | 26078   |
| FeBr <sub>2</sub> | $P\bar{3}m1$ | 15.5 | 22.2 | FeBr <sub>2</sub>                                                             | COD  | 9009102 |
| CuBr              | $P4/nmm$     | 15.5 | 22.9 | Cu <sub>2</sub> Br <sub>2</sub>                                               | COD  | 9013931 |
| CrBr <sub>2</sub> | $P\bar{1}$   | 15.5 | 22.0 | CrBr <sub>2</sub>                                                             | ICSD | 23903   |
| ZrBr              | $P\bar{3}m1$ | 15.6 | 22.5 | Zr <sub>2</sub> Br <sub>2</sub>                                               | COD  | 4343762 |
| VBr <sub>2</sub>  | $C2/m$       | 15.8 | 22.1 | VBr <sub>2</sub>                                                              | ICSD | 246906  |
| CoBr <sub>2</sub> | $P\bar{3}m1$ | 16.8 | 23.3 | CoBr <sub>2</sub>                                                             | COD  | 9016149 |
| NiBr <sub>2</sub> | $P\bar{3}m1$ | 18.1 | 24.4 | NiBr <sub>2</sub>                                                             | COD  | 9008013 |
| PbI <sub>2</sub>  | $P\bar{3}m1$ | 8.6  | 16.1 | Pb <sub>2</sub> I <sub>4</sub>                                                | COD  | 9009143 |
| GeI <sub>2</sub>  | $P\bar{6}m2$ | 8.8  | 13.3 | GeI <sub>2</sub>                                                              | COD  | 1010319 |
| CaI <sub>2</sub>  | $P\bar{3}m1$ | 9.9  | 15.3 | CaI <sub>2</sub>                                                              | COD  | 9009097 |
| TmI <sub>2</sub>  | $P\bar{3}m1$ | 10.5 | 16.1 | TmI <sub>2</sub>                                                              | ICSD | 43731   |
| YbI <sub>2</sub>  | $P\bar{3}m1$ | 10.6 | 16.1 | YbI <sub>2</sub>                                                              | ICSD | 77907   |
| CdI <sub>2</sub>  | $P\bar{3}m1$ | 10.7 | 17.2 | Cd <sub>3</sub> I <sub>6</sub>                                                | ICSD | 20745   |
| MgI <sub>2</sub>  | $P\bar{3}m1$ | 10.8 | 16.2 | MgI <sub>2</sub>                                                              | COD  | 9009108 |
| HgI <sub>2</sub>  | $P\bar{4}m2$ | 11.5 | 18.8 | Hg <sub>2</sub> I <sub>4</sub>                                                | COD  | 9014434 |
| ZnI <sub>2</sub>  | $P\bar{3}m1$ | 11.7 | 17.4 | ZnI <sub>2</sub>                                                              | COD  | 9009137 |
| GeI <sub>2</sub>  | $P\bar{3}m1$ | 12.1 | 17.6 | Ge <sub>3</sub> I <sub>6</sub>                                                | ICSD | 23176   |
| AgI               | $P4/nmm$     | 13.5 | 20.8 | Ag <sub>2</sub> I <sub>2</sub>                                                | COD  | 1509387 |
| CuI               | $P\bar{3}m1$ | 14.7 | 20.9 | Cu <sub>6</sub> I <sub>6</sub>                                                | ICSD | 30363   |
| ZrI <sub>2</sub>  | $P2_1/m$     | 14.8 | 21.0 | Zr <sub>4</sub> I <sub>8</sub>                                                | ICSD | 26418   |
| CuI               | $C2/m$       | 14.8 | 21.7 | Cu <sub>2</sub> I <sub>2</sub>                                                | COD  | 9013923 |

|                  |                                |      |      |                                |      |         |
|------------------|--------------------------------|------|------|--------------------------------|------|---------|
| AuI              | <i>Cmme</i>                    | 15.1 | 22.4 | Au <sub>4</sub> I <sub>4</sub> | COD  | 9008986 |
| LaI <sub>2</sub> | <i>P4/mmm</i>                  | 15.6 | 21.2 | LaI <sub>2</sub>               | COD  | 1529708 |
| VI <sub>2</sub>  | <i>C2/m</i>                    | 16.4 | 22.4 | VI <sub>2</sub>                | ICSD | 246907  |
| NdI <sub>2</sub> | <i>P4/mmm</i>                  | 16.4 | 21.9 | NdI <sub>2</sub>               | ICSD | 72190   |
| CrI <sub>2</sub> | <i>P2<sub>1</sub>/m</i>        | 16.8 | 22.5 | CrI <sub>2</sub>               | ICSD | 4073    |
| FeI <sub>2</sub> | <i>P<math>\bar{3}</math>m1</i> | 16.9 | 23.3 | FeI <sub>2</sub>               | COD  | 9009103 |
| MnI <sub>2</sub> | <i>C2/m</i>                    | 17.0 | 23.3 | MnI <sub>2</sub>               | COD  | 9009110 |
| CoI <sub>2</sub> | <i>C2/m</i>                    | 18.3 | 24.3 | CoI <sub>2</sub>               | COD  | 9009100 |
| SrI <sub>2</sub> | <i>Pmmm</i>                    | 21.2 | 26.6 | Sr <sub>4</sub> I <sub>8</sub> | ICSD | 203137  |
| NiI <sub>2</sub> | <i>P<math>\bar{3}</math>m1</i> | 21.5 | 26.9 | NiI <sub>2</sub>               | COD  | 9009133 |

### References:

- [1] L. D. Landau and E. M. Lifshitz, *Course of Theoretical Physics Vol 7: Theory and Elasticity*, Elsevier, 2013.
- [2] M. Maździarz, Comment on ‘The Computational 2D Materials Database: high-throughput modeling and discovery of atomically thin crystals’, *2D Mater.*, 2019, **6**(4), 048001.
- [3] N. Mounet, M. Gibertini, P. Schwaller, D. Campi, A. Merkys, A. Marrazzo, T. Sohier, I. E. Castelli, A. Cepellotti and G. Pizzi, Two-dimensional materials from high-throughput computational exfoliation of experimentally known compounds, *Nat. Nanotechnol.*, 2018, **13**(3), 246-252.
